# Supplementary material for: Interpretable Machine Learning Analysis of Stress Concentration in Magnesium: An Insight beyond the Black Box of Predictive Modeling
Source: MDPI journal article supplement (doi:10.3390/cryst12091247), 2022-09-02
Supplement: s1 [file s1]

**Supplementary information for**  
**Interpretable machine learning analysis of stress concentration in magnesium: an insight**  
**beyond the black box of predictive modeling**

**Russlan Jaafreh, Jung-Gu Kim \* and Kotiba Hamad \***

School of Advanced Material Science and Engineering, Sungkyunkwan University, Suwon  
16419, Korea

\* Correspondence: authors: kimjg@skku.ac.kr (J.-G.K.), hamad82@skku.edu\_(K.H.)

**Content:**

- 1. Elemental Features**
- 2. Feature Transformation**
- 3. Min-Max normalization of ALE plots**

## 1. Elemental Features:

The features that have been are experimental data that have been obtained from the electron backscatter diffraction analysis (EBSD) of a Mg and AZ31 samples. Those features include the microstructural parameters, composition, strain, as well as geometric information about the grains (Table. S1)

Table S1. The elemental features that have been used in this work.

| Feature category          | Feature                  |                |                                      |
|---------------------------|--------------------------|----------------|--------------------------------------|
| Geometric Features        | X-axis                   | Y-axis         |                                      |
| Microstructure parameters | Grain size (GS)          | SF (Basal)     | SF (1 <sup>st</sup> order <a> Pyr)   |
|                           | Grain aspect ratio (GAR) | SF (<a> Prism) | SF (1 <sup>st</sup> order <c> Pyr)   |
|                           | Misorientation (MO)      | SF (<c> Prism) | SF (2 <sup>nd</sup> order <a+c> Pyr) |
| Stress/Strain parameters  | Strain (%)               |                |                                      |
| Composition (at. %)       | Mg                       | Al             | Zr                                   |

## 2. Feature Transformations:

To enlarge the feature pool that is being used in this work, we have opted to use several mathematic transformations for the 16 elemental features mentioned above. Those transformations are; logarithmic transformation, squaring, cubing, cosine, sine, square root, exponential of the harmonic mean, and others. The following Table S2 shows the full feature list that have been used in this work:

Table S2. The full feature list (after the transformation process) that has been used in this work.

|        |    |                                      |        |                         |           |                             |                |            |
|--------|----|--------------------------------------|--------|-------------------------|-----------|-----------------------------|----------------|------------|
| X-axis | GS | SF (1 <sup>st</sup> order <a> Pyr)   | $AR^3$ | $\log AR$               | $\sin MO$ | $\sqrt{MO}$                 | Total SF (TSF) | $TSF^3$    |
| Y-axis | AR | SF (1 <sup>st</sup> order <c> Pyr)   | $GS^3$ | $\exp(AR)$              | $\cos GS$ | $\text{asin}(SF < Basal >)$ | Average (SF)   | $\cos TSF$ |
| Strain | MO | SF (2 <sup>nd</sup> order <a+c> Pyr) | $MO^3$ | $\exp[H(GS \times AR)]$ | $\cos AR$ | $\text{acos}(SF (Basal))$   | Median (SF)    | $\sin TSF$ |

|             |        |                |           |                                   |             |                     |                               |             |
|-------------|--------|----------------|-----------|-----------------------------------|-------------|---------------------|-------------------------------|-------------|
| Mg<br>(at%) | $AR^2$ | SF (Basal)     | $\log AR$ | $\exp[H(GS \times AR \times MO)]$ | $\cos MO$   | $\cos(SF(Basal))$   | Range<br>(SF)                 | $\log TSF$  |
| Al<br>(at%) | $GS^2$ | SF (<a> Prism) | $\log GS$ | $\sin GS$                         | $\sqrt{AR}$ | $\cos^2(SF(Basal))$ | Standard<br>deviation<br>(SF) | $\exp(TSF)$ |
| Zr<br>(at%) | $MO^2$ | SF (<c> Prism) | $\log MO$ | $\sin AR$                         | $\sqrt{GS}$ | $\sqrt{SF(Basal)}$  | $TSF^2$                       |             |

Where TSF is the total schmid factor which is a simple superposition of (SF (Basal), SF (<a> Prism), SF (<a> Prism), SF (2<sup>nd</sup> order <c+a>), SF (1<sup>st</sup> order <c> Pyr), SF (1<sup>st</sup> order <a> Pyr). The function H, is the harmonic mean, for  $x_1$  and  $x_2$  the harmonic mean is represented as follows:

$$H = \frac{2x_1x_2}{x_1 + x_2}$$

### 3. Min-Max normalization of ALE plots:

Accumulated Local Effects plots in general calculate the local differences between each quantile and the average prediction, this effect is centered around zero, which means that differences can be negative or positive in normal cases. In this work, we have normalized this difference according to a Min-Max normalization:

$$x' = \frac{x - x_{min}}{x_{max} - x_{min}}$$

This step is purely done to understand the relative change that the ALE plot undergoes when changing a specific feature, hence the wording “relative” in our work. Whether this change is negative or positive according to the average is of low importance due to the fact that there is not only accumulated first-order effects, but 2<sup>nd</sup> and n<sup>th</sup> order effects that indulging in how they affect the KAM probability prediction would be out of scope of this work.
